# Supplementary material
Source: ML conference proceedings conference paper supplement (https://proceedings.neurips.cc/paper_files/paper/2023/hash/e6c2e85db1f1039177c4495ccd399ac4-Abstract.html)
Supplement: Supplementary file 1 [file e6c2e85db1f1039177c4495ccd399ac4-Supplemental-Conference.pdf]

## 1 A Implementation Details

### 2 A.1 Preliminary Study

3 The basic GPT-2 model<sup>1</sup> is trained from scratch on each corpus, which has 12 transformer blocks  
4 and 12 attention heads with 768 hidden dimensions. The Huggingface transformers [4] and Pytorch  
5 toolkit [2] are used to train the GPT-2 model in the distributed manner on A100 GPU server. The  
6 hyper-parameters during training are shown in Table 1.

| Hyper-parameter         | Value              |
|-------------------------|--------------------|
| Optimization steps      | 100K               |
| Test interval           | 10K                |
| Dropout rate            | 0.1                |
| Grad clipping           | 1.0                |
| Learning rate           | $5e^{-5}$          |
| Batch size              | 128                |
| Maximum sequence length | 256                |
| Warmup steps            | 10K                |
| Learning scheduler      | Linear decay       |
| Random seed             | 0                  |
| Number of GPUs          | 4                  |
| Learning objective      | Cross-Entropy Loss |

Table 1: The hyper-parameters during GPT-2 training procedure.

#### 7 A.1.1 Our Method

8 Most of the hyper-parameters for our proposed method are the same as that in Table 1 for better  
9 variable controlling. The specific hyper-parameters for our proposed method are the length of  
10 repetitive  $n$ -gram and its repetition dropout rate  $p$ , which are set as 2 and 0.6, respectively.

#### 11 A.1.2 Baselines

12 In this subsection, the specific hyper-parameters for three baselines are described, and most of the  
13 hyper-parameters are the same as that in Table 2.

| Hyper-parameter                                  | Value |
|--------------------------------------------------|-------|
| <i>Re-encoding of High-inflow Tokens (HI-RE)</i> |       |
| Re-encoding $\gamma$                             | 0.03  |
| <i>Scaled Gradient (SCALEGRAD)</i>               |       |
| Scale grade $\gamma$                             | 0.2   |
| <i>Token-level Unlikelihood Training (UL)</i>    |       |
| Rank alpha $\alpha$                              | 1.0   |

Table 2: The hyper-parameters of three baselines in this paper.

## 14 B Classification of Repetition Words

15 We categorize repetitions into three groups, as outlined by Altmann and Köhler [1] and Tannen  
16 [3]: *grammar*, *theme*, and *limited inventory*. For each sampled instance, we initially determine  
17 whether the repetitive  $n$ -gram falls under the grammar category, meaning any word in the  $n$ -gram  
18 is a determiner, preposition, conjunction, etc. Next, if the repetitive  $n$ -gram does not belong to  
19 the grammar category, we assess whether any words are closely related to the text’s subject matter,  
20 thereby placing it in the theme category. For instance, "H. gammarus" is considered part of the  
21 theme category when repetitively used in an article about Homarus gammarus. The third category

<sup>1</sup>Model details can be found at <https://huggingface.co/gpt2>

22 encompasses repetitions stemming from a language's limited means of expressing a specific concept,  
23 known as limited inventory. Popular phrases such as "pair of" are examples of repetitive  $n$ -grams in  
24 this category.

25 In cases where multiple repetitive  $n$ -grams appear within a 256-word sentence, we only take one into  
26 account. If a repetitive  $n$ -gram satisfies the criteria for more than one category, particularly theme  
27 and limited inventory, we allocate it to the earliest applicable category.

## 28 **References**

29 [1] Gabriel Altmann and Reinhard Köhler. 2015. *Forms and degrees of repetition in texts: detection*  
30 *and analysis*, volume 68. Walter de Gruyter GmbH & Co KG.

31 [2] Adam Paszke, Sam Gross, Francisco Massa, Adam Lerer, James Bradbury, Gregory Chanan,  
32 Trevor Killeen, Zeming Lin, Natalia Gimelshein, Luca Antiga, Alban Desmaison, Andreas  
33 Kopf, Edward Yang, Zachary DeVito, Martin Raison, Alykhan Tejani, Sasank Chilamkurthy,  
34 Benoit Steiner, Lu Fang, Junjie Bai, and Soumith Chintala. 2019. *PyTorch: An Imperative*  
35 *Style, High-Performance Deep Learning Library*. In *Advances in Neural Information Processing*  
36 *Systems* 32, pages 8024–8035. Curran Associates, Inc.

37 [3] Deborah Tannen. 1987. Repetition in conversation: Toward a poetics of talk. *Language*, pages  
38 574–605.

39 [4] Thomas Wolf, Lysandre Debut, Victor Sanh, Julien Chaumond, Clement Delangue, Anthony Moi,  
40 Perric Cistac, Clara Ma, Yacine Jernite, Julien Plu, Canwen Xu, Teven Le Scao, Sylvain Gugger,  
41 Mariama Drame, Quentin Lhoest, and Alexander M. Rush. 2020. *Transformers: State-of-the-Art*  
42 *Natural Language Processing*. pages 38–45. Association for Computational Linguistics.
